# Supplementary material
Source: publisher site journal article supplement (https://www.dovepress.com/article/377140)
Supplement: Supplementary file 1 [file get_supplementary_file.php]

## SUPPLEMENTARY MATERIAL

### **Supplementary Material Tables:**

**Table 1. Supplementary material:** Demographic and clinical characteristics of EPISCAN and EPISCAN II participants by sex

**Table 2. Supplementary material:** Factors associated with COPD for EPISCAN and EPISCAN II. Crude and multivariate analysis

**Table 3. Supplementary material:** Factors associated with COPD for MEN and WOMEN. Crude and multivariate analysis

### **Supplementary Material Figures:**

**Figure 1. Supplementary material:** Flowchart of the study

**Figure 2. Supplementary Material:** Standardised regression coefficients for the relationships between gender (women) and COPD prevalence by smoking habit

**Table 1 Supplementary material.** Demographic and clinical characteristics of EPISCAN and EPISCAN II participants by sex

|                                                                                | EPISCAN     |             |                 |                       | EPISCAN II   |              |                 |                       |
|--------------------------------------------------------------------------------|-------------|-------------|-----------------|-----------------------|--------------|--------------|-----------------|-----------------------|
|                                                                                | Male        | Female      | <i>P</i> -value | Test used             | Male         | Female       | <i>P</i> -value | Test used             |
| <b>Subjects, n (%)</b>                                                         | 324 (45.3%) | 391 (54.7%) |                 |                       | 286 (52.6%)  | 258 (47.4%)  |                 |                       |
| <b>Age range, n (%)</b>                                                        |             |             | 0.706           | Chi-squared           |              |              | 0.002           | Chi-squared           |
| 40-50 yrs                                                                      | 106 (32.7%) | 119 (30.4%) |                 |                       | 46 (16.1%)   | 57 (22.1%)   |                 |                       |
| 50-60 yrs                                                                      | 90 (27.8%)  | 122 (31.2%) |                 |                       | 127 (44.4%)  | 75 (29.1%)   |                 |                       |
| 60-70 yrs                                                                      | 77 (23.8%)  | 85 (21.7%)  |                 |                       | 67 (23.4%)   | 80 (31.0%)   |                 |                       |
| 70-80 yrs                                                                      | 51 (15.7%)  | 65 (16.6%)  |                 |                       | 46 (16.1%)   | 46 (17.8%)   |                 |                       |
| <b>Smoking history, pack-yrs mean±SD</b>                                       | 32.5 ± 24.7 | 20.3 ± 16.9 | <0.001          | Mann-Whitney-Wilcoxon | 35.0 (23.2%) | 27.5 (21.5%) | <0.001          | Mann-Whitney-Wilcoxon |
| <b>Smoking status, n (%)</b>                                                   |             |             | <0.001          | Chi-squared           |              |              | 0.518           | Chi-squared           |
| Smoker                                                                         | 101 (31.2%) | 90 (23.0%)  |                 |                       | 73 (25.5%)   | 67 (26.0%)   |                 |                       |
| Former smoker                                                                  | 137 (42.3%) | 98 (25.1%)  |                 |                       | 108 (37.8%)  | 86 (33.3%)   |                 |                       |
| Never smoker                                                                   | 86 (26.5%)  | 203 (51.9%) |                 |                       | 105 (36.7%)  | 105 (40.7%)  |                 |                       |
| <b>Weight, kg mean±SD</b>                                                      | 81.4 ± 12.9 | 67.6 ± 12.6 | <0.001          | Mann-Whitney-Wilcoxon | 82.8 (15.2)  | 67.1 (13.6)  | <0.001          | Mann-Whitney-Wilcoxon |
| <b>Height, cm mean±SD</b>                                                      | 170.0 ± 7.3 | 158.0 ± 6.9 | <0.001          | t-test                | 174.0 (6.78) | 161.0 (6.73) | <0.001          | t-test                |
| <b>BMI, kg/m<sup>2</sup> mean (±SD)</b>                                        | 28.3 ± 4.2  | 27.3 ± 5.0  | <0.001          | Mann-Whitney-Wilcoxon | 27.4 (4.46)  | 26.0 (5.08)  | <0.001          | Mann-Whitney-Wilcoxon |
| <b>University education, n (%)</b>                                             | 122 (37.7%) | 99 (25.3%)  | <0.001          | Chi-squared           | 238 (83.2%)  | 181 (70.2%)  | <0.001          | Chi-squared           |
| <b>Lives alone, n (%)</b>                                                      | 14 (13.0%)  | 9 (10.6%)   | 0.778           | Chi-squared           | 56 (19.6%)   | 84 (32.6%)   | <0.001          | Chi-squared           |
| <b>Work environment with exposure to fumes, dust or other substances n (%)</b> | 142 (43.8%) | 71 (18.2%)  | <0.001          | Chi-squared           | 7 (53.8%)    | 8 (21.6%)    | 0.067           | Chi-squared           |
| <b>Previous diagnoses, n (%)</b>                                               |             |             |                 |                       |              |              |                 |                       |
| COPD                                                                           | 10 (3.1%)   | 0 (0.0%)    | 0.001           | Chi-squared           | 28 (9.8%)    | 38 (14.7%)   | 0.103           | Chi-squared           |
| Chronic bronchitis                                                             | 16 (4.9%)   | 6 (1.5%)    | 0.016           | Chi-squared           | 10 (3.5%)    | 10 (3.9%)    | 0.995           | Chi-squared           |
| Emphysema                                                                      | 3 (0.9%)    | 2 (0.5%)    | 0.833           | Chi-squared           | 3 (1.1%)     | 1 (0.4%)     | 0.690           | Chi-squared           |
| Asthma                                                                         | 18 (5.6%)   | 42 (10.7%)  | 0.019           | Chi-squared           | 28 (9.8%)    | 24 (9.3%)    | 0.962           | Chi-squared           |
| <b>Symptoms, n (%)</b>                                                         |             |             |                 |                       |              |              |                 |                       |
| Cough                                                                          | 39 (12.1%)  | 32 (8.2%)   | 0.109           | Chi-squared           | 37 (13.0%)   | 43 (16.7%)   | 0.275           | Chi-squared           |
| Expectoration                                                                  | 36 (11.1%)  | 27 (6.9%)   | 0.065           | Chi-squared           | 41 (14.6%)   | 39 (15.4%)   | 0.900           | Chi-squared           |

|                                              |             |              |        |                       |              |              |       |                       |
|----------------------------------------------|-------------|--------------|--------|-----------------------|--------------|--------------|-------|-----------------------|
| Wheezing                                     | 133 (41.2%) | 149 (38.2%)  | 0.465  | Chi-squared           | 100 (35.1%)  | 67 (26.1%)   | 0.020 | Chi-squared           |
| Dyspnoea                                     | 29 (9.0%)   | 44 (11.3%)   | 0.368  | Chi-squared           | 27 (9.5%)    | 45 (17.4%)   | 0.001 | Chi-squared           |
| <b>FVC % post-BD, ml mean±SD</b>             | 96.2 ± 15.7 | 103.0 ± 15.3 | <0.001 | t-test                | 102.0 (17.9) | 102.0 (17.1) | 0.556 | Mann-Whitney-Wilcoxon |
| <b>FEV<sub>1</sub> % post-BD, ml mean±SD</b> | 99.3 ± 19.8 | 110.0 ± 17.8 | <0.001 | Mann-Whitney-Wilcoxon | 102.0 (14.9) | 104.0 (15.7) | 0.234 | t-test                |
| <b>Prevalence COPD GOLD, n(%)</b>            | 57 (17.6%)  | 22 (5.6%)    | <0.001 | Chi-squared           | 28 (9.8%)    | 38 (14.7%)   | 0.103 | Chi-squared           |
| <b>Prevalence LLN, n(%)</b>                  | 36 (11.1%)  | 19 (4.9%)    | 0.002  | Chi-squared           | 15 (5.2%)    | 25 (9.7%)    | 0.060 | Chi-squared           |

**BMI:** body mass index; **FVC:** forced vital capacity; **FEV<sub>1</sub>:** forced expiratory volume in 1 s; **COPD:** chronic obstructive pulmonary disease; **GOLD:** Global Initiative for Chronic Obstructive Lung Disease **LLN:** lower limit of normal.

**Table 2 Supplementary material.** Factors associated with COPD for EPISCAN and EPISCAN II. Crude and multivariate analysis

| Factor                                    | Categories              | EPISCAN          |         |                   |         | EPISCAN II       |         |                   |         |
|-------------------------------------------|-------------------------|------------------|---------|-------------------|---------|------------------|---------|-------------------|---------|
|                                           |                         | Crude            |         | Multivariate      |         | Crude            |         | Multivariate      |         |
|                                           |                         | OR [IC 95%]      | P-value | OR [IC 95%]       | P-value | OR [IC 95%]      | P-value | OR [IC 95%]       | P-value |
| Age                                       | 40-49 yr (ref)          | -                | -       | -                 | -       | -                | -       | -                 | -       |
|                                           | 50-59 yr                | 2.4 [1.1 - 5.1]  | 0.030   | 2.8 [1.2 - 6.5]   | 0.018   | 0.9 [0.4 - 2.1]  | 0.820   | 2.1 [0.2 - 35.0]  | 0.630   |
|                                           | 60-69 yr                | 3.4 [1.6 - 7.3]  | 0.002   | 5.9 [2.5 - 14.4]  | < 0.001 | 1.5 [0.7 - 3.2]  | 0.353   | 8.3 [0.4 - 24.3]  | 0.741   |
|                                           | 70-79 yr                | 6.2 [2.9 - 13.4] | < 0.001 | 13.1 [5.2 - 33.2] | < 0.001 | NA               | NA      | NA                | NA      |
| Gender                                    | Male                    | 3.6 [2.1 - 6.0]  | < 0.001 | 3.7 [1.9 - 7.0]   | < 0.001 | 0.6 [0.4 - 1.1]  | 0.080   | 0.7 [0.2 - 2.7]   | 0.160   |
|                                           | Female (ref.)           |                  |         |                   |         |                  |         |                   |         |
| Smoking status                            | Current                 | 3.3 [1.8 - 6.2]  | < 0.001 | 7.8 [3.5 - 17.3]  | < 0.001 | 4.1 [2.0 - 8.4]  | < 0.001 | 18.1 [0.4 - 24.9] | 0.138   |
|                                           | Former                  | 2.3 [1.2 - 4.2]  | 0.011   | 2.8 [1.3 - 5.9]   | 0.008   | 2.6 [1.3 - 5.2]  | 0.010   | 1.2 [0.1 - 26.2]  | 0.921   |
|                                           | Never (ref)             | -                | -       | -                 | -       | -                | -       | -                 | -       |
| Education                                 | No education            | 2.1 [1.0 - 4.6]  | 0.064   | 2.1 [0.8 - 5.1]   | 0.114   | NA               | NA      | NA                | NA      |
|                                           | Primary education (ref) | -                | -       | -                 | -       | -                | -       | -                 | -       |
|                                           | Secondary education     | 0.6 [0.3 - 1.1]  | 0.080   | 0.6 [0.3 - 1.3]   | 0.217   | NA               | NA      | NA                | NA      |
|                                           | University education    | 0.7 [0.4 - 1.3]  | 0.293   | 0.7 [0.3 - 1.4]   | 0.269   | 0.4 [0.2 - 1.2]  | 0.114   | 7.7 [0.1 - 25.3]  | 0.339   |
| Occupational and biomass exposure history | No (ref)                | -                | -       | -                 | -       | -                | -       | -                 | -       |
|                                           | Yes                     | 0.7 [0.4 - 1.1]  | 0.156   | 1.5 [0.8 - 2.8]   | 0.262   | 2.6 [0.5 - 13.7] | 0.259   | 1.7 [0.5 - 6.5]   | 0.121   |
| BMI (kg/m <sup>2</sup> mean)              | <21                     | 2.7 [1.0 - 6.9]  | 0.043   | 5.4 [1.8 - 16.3]  | 0.003   | NA               | NA      | NA                | NA      |
|                                           | ≥21 (ref)               | -                | -       | -                 | -       | -                | -       | -                 | -       |
| YPAS                                      | 1 y 2 (ref)             | -                | -       | -                 | -       | -                | -       | -                 | -       |
|                                           | 3-4                     | 5.6 [2.5 - 12.9] | < 0.001 | 4.2 [1.5 - 11.6]  | 0.005   | 3.8 [1.6 - 8.8]  | 0.002   | 4.4 [0.4 - 13.2]  | 0.121   |

Data are presented as OR (95% CI). COPD is defined as postbronchodilator FEV<sub>1</sub> /FVC < 0.7

BMI: body mass index; YPAS: yale physical activity survey; ref= reference; NA: not available

**Table 3 Supplementary material.** Factors associated with COPD for MEN and WOMEN. Crude and multivariate analysis

| Factor                                    | Categories               | MEN              |         |                    |         | WOMEN           |         |                  |         |
|-------------------------------------------|--------------------------|------------------|---------|--------------------|---------|-----------------|---------|------------------|---------|
|                                           |                          | Crude            |         | Multivariate       |         | Crude           |         | Multivariate     |         |
|                                           |                          | OR [IC 95%]      | P-value | OR [IC 95%]        | P-value | OR [IC 95%]     | P-value | OR [IC 95%]      | P-value |
| Age                                       | 40-49 yr (ref)           | -                | -       | -                  | -       | -               | -       | -                | -       |
|                                           | 50-59 yr                 | 2.0 [0.9 - 4.7]  | 0.097   | 4.0 [1.3 - 12.3]   | 0.018   | 1.3[0.6 - 2.8]  | 0.515   | 2.6[0.8 - 8.4]   | 0.124   |
|                                           | 60-69 yr                 | 4.3 [1.9 - 9.9]  | < 0.001 | 11.1 [3.3 - 37.3]  | < 0.001 | 1.3 [0.6 - 2.8] | 0.562   | 3.0 [0.8 - 11.6] | 0.103   |
|                                           | 70-79 yr                 | 6.9 [3.0 - 16.1] | < 0.001 | 28.9 [8.2 - 102.4] | < 0.001 | 2.5 [1.1 - 5.4] | 0.023   | 9.7 [2.4 - 38.3] | 0.001   |
| Smoking status                            | Current                  | 4.0 [1.9 - 8.1]  | < 0.001 | 11.5 [3.7 - 35.8]  | < 0.001 | 3.3 [1.8 - 6.3] | < 0.001 | 6.3 [2.0 - 19.6] | 0.001   |
|                                           | Former                   | 3.2 [1.6 - 6.4]  | 0.001   | 3.1 [1.1 - 8.3]    | 0.028   | 1.4 [0.7 - 2.9] | 0.324   | 2.8 [0.9 - 8.9]  | 0.081   |
|                                           | Never (ref)              | -                | -       | -                  | -       | -               | -       | -                | -       |
| Education                                 | No education             | 2.5 [0.8 - 7.5]  | 0.099   | 2.7 [0.8 - 9.3]    | 0.118   | 2.0 [0.7 - 6.1] | 0.218   | 2.1 [0.6 - 7.8]  | 0.264   |
|                                           | Primary education ( ref) | -                | -       | -                  | -       | -               | -       | -                | -       |
|                                           | Secondary education      | 0.6 [0.3 - 1.3]  | 0.217   | 0.8 [0.3 - 2.0]    | 0.600   | 0.7 [0.2 - 1.5] | 0.317   | 0.7 [0.2 - 2.1]  | 0.496   |
|                                           | University education     | 0.4 [0.2 - 0.7]  | 0.002   | 0.7 [0.3 - 1.6]    | 0.364   | 1.3 [0.7 - 2.6] | 0.446   | 0.9 [0.3 - 2.9]  | 0.909   |
| Occupational and biomass exposure history | No (ref)                 | -                | -       | -                  | -       | -               | -       | -                | -       |
|                                           | Yes                      | 1.2 [0.7 - 2.1]  | 0.547   | 2.2 [1.0 - 4.6]    | 0.045   | 0.8 [0.3 - 1.9] | 0.605   | 0.7 [0.3 - 2.0]  | 0.506   |
| BMI (kg/m <sup>2</sup> mean)              | <21                      | 1.7 [0.6 - 4.8]  | 0.283   | 3.3 [0.6 - 19.4]   | 0.181   | 2.7 [1.3 - 5.4] | 0.005   | 9.6 [2.7 - 34.3] | < 0.001 |
|                                           | ≥21 (ref)                | -                | -       | -                  | -       | -               | -       | -                | -       |
| YPAS                                      | 1 y 2 (ref)              | -                | -       | -                  | -       | -               | -       | -                | -       |
|                                           | 3-4                      | 6.9 [2.8 - 17.0] | < 0.001 | 4.2 [1.1 - 17.0]   | 0.043   | 4.0 [1.8 - 9.0] | < 0.001 | 5.7 [1.7 - 18.6] | 0.004   |

Data are presented as OR (95% CI). COPD is defined as postbronchodilator FEV1 /FVC < 0.7

BMI: body mass index; YPAS: yale physical activity survey; ref= reference

**Figure 1 Supplementary material.** Flowchart of the study

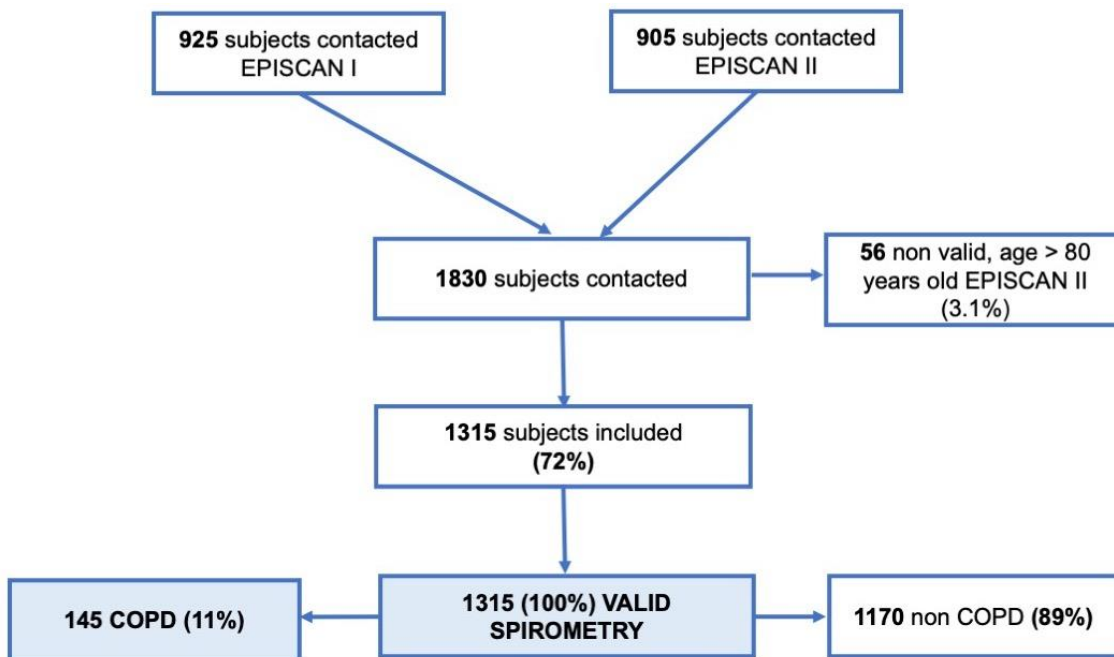

**Figure 2 Supplementary Material.** Standardised regression coefficients for the relationships between gender (women) and COPD prevalence by smoking habit.

Episcan

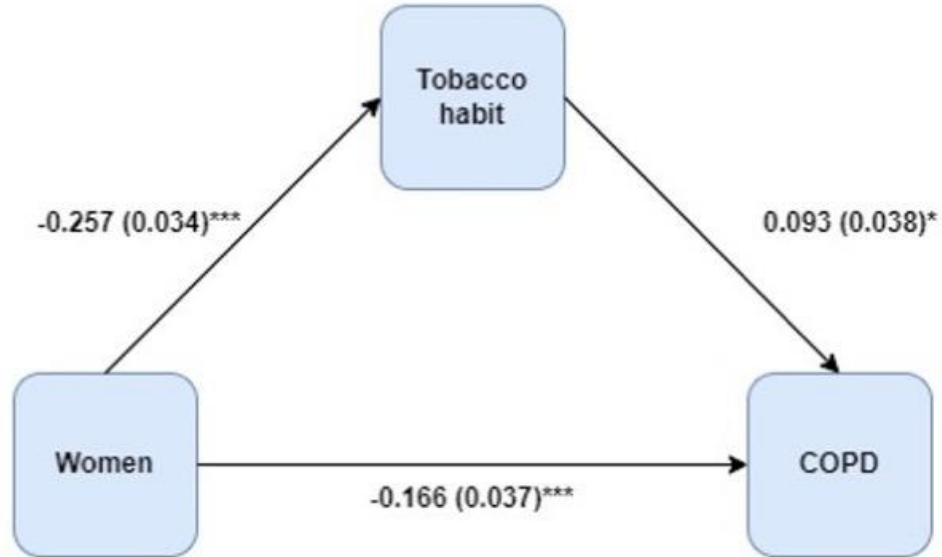

Episcan II

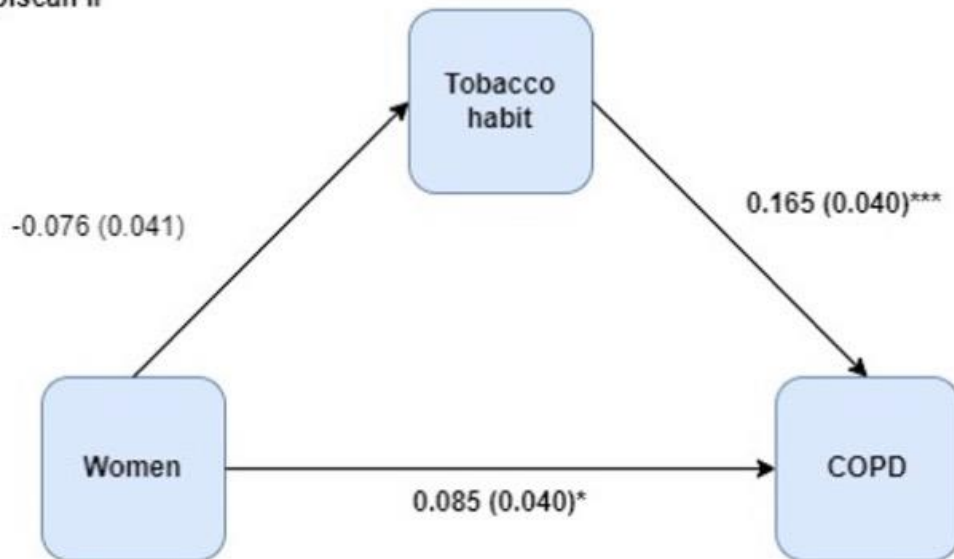

The value of the standardized regression coefficient is shown at the middle of the arrow and the standard error in parentheses. Significant effects are shown in bold and with asterisks ( $p < 0.05$  \*,  $p < 0.01$  \*\*,  $p < 0.001$  \*\*\*)
